# Supplementary material
Source: PubMed Central journal article supplement (PMC59806)

Control

MKK3bE

MKK6bE

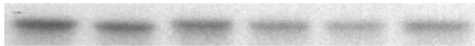

ERK

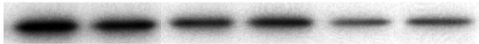

JNK

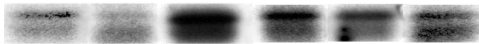

p38

Supplement: pnas_211086598_11.pdf [file pnas_211086598_11.pdf]

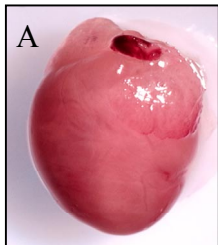

Wildtype

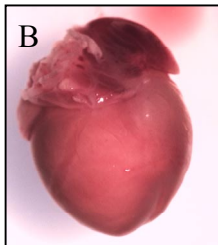

GFP (MKK3bE)

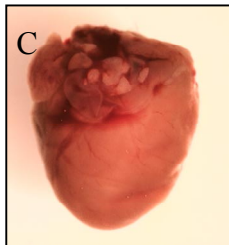

GFP (MKK6bE)

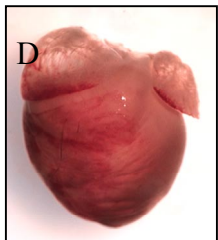

Cre

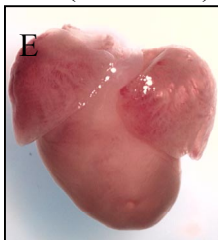

MKK3bE

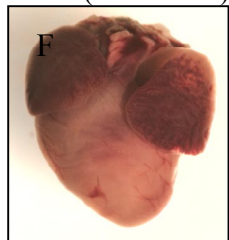

MKK6bE

Supplement: pnas_211086598_7.pdf [file pnas_211086598_7.pdf]

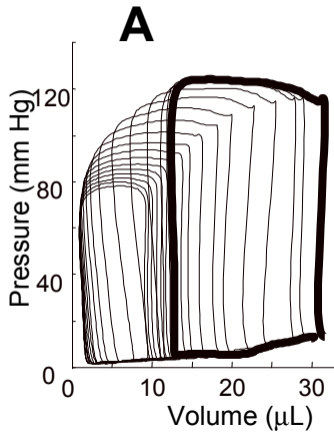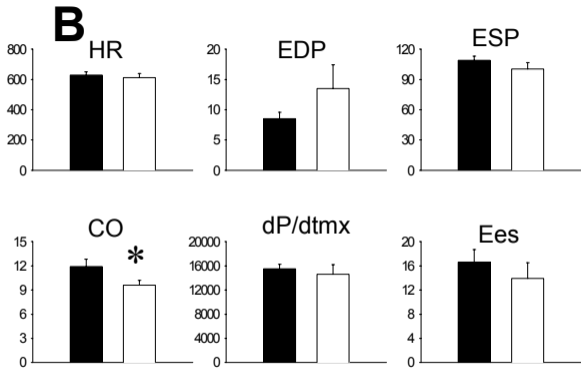

Supplement: pnas_211086598_8.pdf [file pnas_211086598_8.pdf]

**WT**

**KT**

**BK**

**Ao**

**LA**

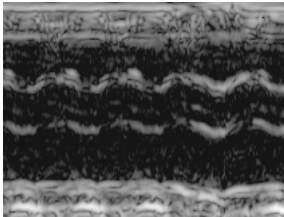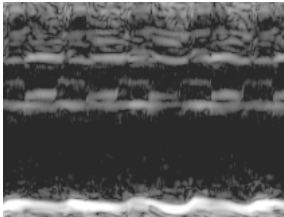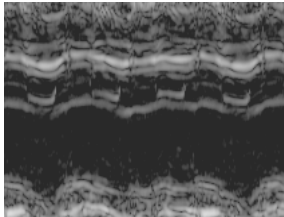

Supplement: pnas_211086598_9.pdf [file pnas_211086598_9.pdf]
